# Supplementary material for: Clinical Outcomes Following a Change in Gestational Diabetes Mellitus Diagnostic Criteria Due to the COVID-19 Pandemic: A Case-Control Study
Source: MDPI journal article supplement (doi:10.3390/ijerph19031884), 2022-02-08
Supplement: s1 [file s1]

Table S1. Maternal and neonatal outcomes compared based on those with a positive Glucose Challenge Test (GCT) in 2019 to those with a positive GCT in 2020

|                                                                  | All 2019<br>n=218 | All 2020<br>n=210 | p value |
|------------------------------------------------------------------|-------------------|-------------------|---------|
| BMI, mean (SD)                                                   | 26.7 (5.9)        | 27.3 (6)          | 0.288   |
| Age in years, mean (SD)                                          | 36 (5)            | 35 (5.1)          | 0.212   |
| Gestational Age at GCT (weeks), median (SD)                      | 28 (4.6)          | 28 (4.3)          | 0.6     |
| Booking weight mean in kg (SD)                                   | 72.7 (16.3)       | 72.9 (16.4)       | 0.554   |
| Infant head circumference centile, mean (SD)                     | 70.3 (27.6)       | 75 (28)           | 0.457   |
| Infant length centile (SD)                                       | 74.8 (28.4)       | 75 (30)           | 0.926   |
| Birth Weight in g (median, SD)                                   | 3633 (505)        | 3648 (584)        | 0.688   |
| PPH (EBL >500ml as % of births), n(%)                            | 46 (21.1%)        | 56 (26.7%)        | 0.194   |
| Birth weight (>90 <sup>th</sup> centile by gestation and gender) | 43 (19.7%)        | 55 (26.2%)        | 0.117   |
| Induction of labour (as % of births)                             | 64 (29.4%)        | 79 (38%)          | 0.217   |
| Mode of Birth                                                    |                   |                   |         |
| Spontaneous Vaginal Birth                                        | 110 (50.5%)       | 101 (48.1%)       | 0.625   |
| Instrumental Birth                                               | 24 (11%)          | 25 (11.9%)        | 0.771   |
| Caesarean Section                                                | 84 (38.5%)        | 84 (40%)          | 0.756   |
| NICU admission                                                   | 57 (26.3%)        | 50 (23.8%)        | 0.558   |

*GA- Gestational Age, GCT- Glucose Challenge Test, NICU-Neonatal Intensive Care Admission,*

*SD-Standard Deviation*

Table S2. Comparing all those with a positive Glucose Challenge Test (GCT) but negative second step diagnostic test (Glucose Tolerance Test (GTT) in 2019 compared to those with a negative HbA1c and Fasting Glucose in 2020)

|                                                                   | All GCT positive<br>GDM negative 2019 n=131 | All GCT positive<br>but GDM negative 2020<br>n=167 | p value |
|-------------------------------------------------------------------|---------------------------------------------|----------------------------------------------------|---------|
| BMI (mean, SD)                                                    | 25.4 (6.1)                                  | 26.9 (5.7)                                         | 0.201   |
| Age (median in years, SD)                                         | 36<br>(5)                                   | 36<br>(4.9)                                        | 0.491   |
| Gestational age (weeks) at<br>Glucose Challenge Test<br>(GCT), SD | 28 (4.8)                                    | 28 (4.1)                                           | 0.778   |
| Booking weight in kg<br>(median, SD)                              | 70.1(16.8)                                  | 72.2 (16)                                          | 0.340   |
| Infant head circumference<br>centile (mean, SD)                   | 71.8 (26.3)                                 | 75 (26.2)                                          | 0.407   |
| Infant length centile (mean,<br>SD)                               | 75<br>(30)                                  | 79.1<br>(28.8)                                     | 0.463   |
| Birth Weight in grams<br>(mean, SD)                               | 3650<br>(525)                               | 3680<br>(570)                                      | 0.597   |
| Postpartum haemorrhage<br>(PPH) (EBL >500ml), n(%)                | 26 (21.1%)                                  | 51 (30.5%)                                         | 0.08    |
| Birth weight >90 <sup>th</sup> centile                            | 25 (20.3%)                                  | 46 (27.5%)                                         | 0.158   |
| Gestational Age at birth<br>(weeks), mean, SD)                    | 39.7 (1.5)                                  | 39.7 (1.9)                                         | 0.7     |
| Induction of labour                                               | 32 (26%)                                    | 58 (34.7%)                                         | 0.324   |
| Mode of Birth                                                     |                                             |                                                    | 0.560   |
| Spontaneous Vaginal Birth                                         | 62 (50.4%)                                  | 81 (48.5%)                                         | 0.749   |
| Instrumental Birth                                                | 11 (8.9%)                                   | 22 (13.2%)                                         | 0.262   |
| Caesarean Section                                                 | 50 (40.7%)                                  | 65 (39%)                                           | 0.718   |

*GA- Gestational Age, GCT- Glucose Challenge Test*
